# Supplementary material for: The PCOS Phenotypes in Unselected Populations (P-PUP) study: participant clinical features and data harmonization on analysis of individual participant data
Source: Springer Nature journal article supplement (doi:10.1186/s12916-025-04221-9), 2025-07-15
Supplement: MOESM1 [file 12916_2025_4221_MOESM1_ESM.docx]

**Additional File 1**

Contents

[Table S1: Search strategy for OVID Medline. 2](#_Toc184719149)

[Table S2: Studies excluded following full-text review. 3](#_Toc184719150)

[Table S3: Risk of bias assessment using AXIS tool. 8](#_Toc184719151)

[Table S4: Harmonised variables with definitions in the P-PUP study dataset. 9](#_Toc184719152)

[Table S5. Data collection methods for ovulatory dysfunction across studies. 11](#_Toc184719153)

# Table S1: Search strategy for OVID Medline.

| **Database: Ovid Medline** |
| --- |
| 1. polycystic ovary syndrome/ |
| 1. (ovar* adj3 cyst*).mp |
| 1. polycystic ovar*.mp. |
| 1. 1 or 2 or 3 or 4 |
| 1. exp cohort studies/ or follow-up studies/ or longitudinal studies/ or prospective studies/ or retrospective studies/ |
| 1. cross sectional stud*.mp |
| 1. prevalence.mp |
| 1. community.mp. |
| 1. population.mp |
| 1. exp unselected/ or non-selected/ or national/ |
| 1. 6 or 7 or 8 or 9 or 10 or 11 |
| 1. phenotype.mp. |
| 1. characteristics.mp. |
| 1. features.mp. |
| 1. spectrum.mp. |
| 1. mens*.mp. |
| 1. exp hirsutism/ or hair/ or mFG.mp. |
| 1. ovar* morphology.mp. |
| 1. 13 or 14 or 15 or 16 or 17 or 19 |
| 1. 5 and 12 and 20 |
| 1. limit 21 to (humans and yr="1990 -Current") |

# Table S2: Studies excluded following full-text review.

| **S.No** | **Study reference** | **Rationale** |
| --- | --- | --- |
|  | Aghahosseini et al., 2011 | Conference abstract |
|  | Atkin et al., 2017 | Conference abstract |
|  | Balen et. al., 2015 | Conference abstract |
|  | Baro et al., 2017 | Conference abstract |
|  | Bhatia and Bansal, 2011 | Conference abstract |
|  | Boshku and Panovska, 2016 | Conference abstract |
|  | Bouzas et al., 2013 | Conference abstract |
|  | Bouzas et al., 2015 | Conference abstract |
|  | Bouzas et al., 2019 | Conference abstract |
|  | Chiware et al., 2019 | Conference abstract |
|  | Crisosto et al., 2014 | Conference abstract |
|  | Dargham et al., 2017 | Conference abstract |
|  | De Vries et al., 2015 | Conference abstract |
|  | Delavar et al., 2014 | Conference abstract |
|  | Dewailly et al., 2011 | Conference abstract |
|  | Dietz de Loos et al., 2019 | Conference abstract |
|  | Ekpo et al., 2013 | Conference abstract |
|  | Filippi et al., 2017 | Conference abstract |
|  | Frerichs et al., 2016 | Conference abstract |
|  | Gunn et al., 2018 | Conference abstract |
|  | Guzov et al., 2019 | Conference abstract |
|  | Homer and Chang, 2016 | Conference abstract |
|  | Isabel et al., 2013 | Conference abstract |
|  | Khan and Abdul Rahman, 2014 | Conference abstract |
|  | Khani Robati and Mehrabian, 2012 | Conference abstract |
|  | Kim et al., 2014 | Conference abstract |
|  | Kort et al., 2012 | Conference abstract |
|  | Kyrkou et al., 2015 | Conference abstract |
|  | Le et al., 2017a | Conference abstract |
|  | Le et al., 2017b | Conference abstract |
|  | Lim et al., 2019 | Conference abstract |
|  | Liu et al., 2014 | Conference abstract |
|  | Livadas et al., 2018 | Conference abstract |
|  | Louwers et al., 2012 | Conference abstract |
|  | Marques et al., 2014 | Conference abstract |
|  | Merino et al., 2015 | Conference abstract |
|  | Nair et al., 2012 | Conference abstract |
|  | Noel et al., 2014 | Conference abstract |
|  | Orbetzova and Genchev, 2014 | Conference abstract |
|  | Ould Kablia et al., 2013 | Conference abstract |
|  | Ozcabi et al., 2013 | Conference abstract |
|  | Pawelczak et al., 2011 | Conference abstract |
|  | Pilgrim et al., 2018 | Conference abstract |
|  | Pinola et al., 2013 | Conference abstract |
|  | Premrou et al., 2014 | Conference abstract |
|  | Quinn et al., 2016 | Conference abstract |
|  | Ramezanali, 2013 | Conference abstract |
|  | Sagili et al., 2016 | Conference abstract |
|  | Sharami, 2013 | Conference abstract |
|  | Sharif et al., 2013 | Conference abstract |
|  | Shreeve et al., 2015 | Conference abstract |
|  | Simpson et al., 2020 | Conference abstract |
|  | Sir-Petermann et al., 2011 | Conference abstract |
|  | Tal et al., 2013 | Conference abstract |
|  | Tang et al., 2015 | Conference abstract |
|  | Tarar, 2018 | Conference abstract |
|  | Timur Tashan et al., 2013 | Conference abstract |
|  | Unalome and Wongwananurak, 2018 | Conference abstract |
|  | Van Helden et al., 2019a | Conference abstract |
|  | Van Helden et al., 2019b | Conference abstract |
|  | Villarroel et al., 2011a | Conference abstract |
|  | Wang et al., 2019 | Conference abstract |
|  | Wiser et al., 2012 | Conference abstract |
|  | Yapici Coskun et al., 2012 | Conference abstract |
|  | Ybarra et al., 2016 | Conference abstract |
|  | Yoldemir et al., 2017 | Conference abstract |
|  | Zea-Hernandez et al., 2014 | Conference abstract |
|  | Zhao et al., 2016 | Conference abstract |
|  | Harris et al., 2017 | Ineligible population/co-morbidity |
|  | Isik et al., 1997 | Ineligible population/co-morbidity |
|  | Lauritsen et al., 2014 | Ineligible population/co-morbidity |
|  | Lin et al., 2006 | Ineligible population/co-morbidity |
|  | March et al., 2010 | Ineligible population/co-morbidity |
|  | Miyoshi et al., 2013 | Ineligible population/co-morbidity |
|  | Akbarzadeh et al., 2019 | Not having PCOS/ features |
|  | Dabbaghmanesh et al., 2017 | Not having PCOS/ features |
|  | Hosseinpanah et al., 2014 | Not having PCOS/ features |
|  | Ivonne and Imelda, 2016 | Not having PCOS/ features |
|  | Jarrett et al., 2020 | Not having PCOS/ features |
|  | Moran et al., 2012 | Not having PCOS/ features |
|  | Torchen et al., 2020 | Not having PCOS/ features |
|  | Vrbikova et al., 2010 | Not having PCOS/ features |
|  | Zaki et al., 2015 | Not having PCOS/ features |
|  | Zhang et al., 2015 | Not having PCOS/ features |
|  | Zhang et al., 2017 | Not having PCOS/ features |
|  | Belenkaia et al., 2019 | Review |
|  | Bozdag et al., 2016b | Review |
|  | Doroszewska et al., 2019 | Review |
|  | Hart et al., 2004 | Review |
|  | Knochenhauer et al., 1998 | Same research group/data |
|  | Rashidi et al., 2014 | Same research group/data |
|  | Zhao et al., 2013 | Same research group/data |
|  | Aali and Naderi, 2007 | Selected/referred population |
|  | Alebic et al., 2015 | Selected/referred population |
|  | Alebic et al., 2016 | Selected/referred population |
|  | Alemzadeh et al., 2010 | Selected/referred population |
|  | Alexiou et al., 2017 | Selected/referred population |
|  | Ali et al., 2019 | Selected/referred population |
|  | Amini et al., 2018 | Selected/referred population |
|  | Amiri et al., 2019 | Selected/referred population |
|  | Anaforoglu et al., 2011 | Selected/referred population |
|  | Ates et al., 2013 | Selected/referred population |
|  | Ates et al., 2018 | Selected/referred population |
|  | Bahadur et al., 2020 | Selected/referred population |
|  | Baldani et al., 2012 | Selected/referred population |
|  | Baldani et al., 2013a | Selected/referred population |
|  | Baldani et al., 2013b | Selected/referred population |
|  | Balen et al., 1995 | Selected/referred population |
|  | Bansal et al., 2020a | Selected/referred population |
|  | Bansal et al., 2020b | Selected/referred population |
|  | Bazarganipour et al., 2013a | Selected/referred population |
|  | Bazarganipour et al., 2013b | Selected/referred population |
|  | Behboodi Moghadam et al., 2018 | Selected/referred population |
|  | Bhide et al., 2017 | Selected/referred population |
|  | Borgia et al., 2004 | Selected/referred population |
|  | Bostanci et al., 2016 | Selected/referred population |
|  | Bozdag et al., 2016a | Selected/referred population |
|  | Braga, 2014 | Selected/referred population |
|  | Bui et al., 2015, | Selected/referred population |
|  | Bunker et al., 1991 | Selected/referred population |
|  | Cai et al., 2019, | Selected/referred population |
|  | Carmina and Lobo, 2007 | Selected/referred population |
|  | Carmina et al., 1997 | Selected/referred population |
|  | Carmina et al., 2012 | Selected/referred population |
|  | Carmina et al., 2013 | Selected/referred population |
|  | Carmona-Ruiz et al., 2015 | Selected/referred population |
|  | Chae et al., 2008 | Selected/referred population |
|  | Chen et al., 2008 | Selected/referred population |
|  | Christ et al., 2017 | Selected/referred population |
|  | Cibula et al., 2000 | Selected/referred population |
|  | Cui et al., 2014 | Selected/referred population |
|  | Cupisti et al., 2007 | Selected/referred population |
|  | Dabadghao et al., 2017 | Selected/referred population |
|  | De Guevara et al., 2013 | Selected/referred population |
|  | DeUgarte et al., 2005 | Selected/referred population |
|  | Dewailly et al., 2014 | Selected/referred population |
|  | Dey et al., 2011 | Selected/referred population |
|  | Diamanti-Kandarakis and Panidis, 2007 | Selected/referred population |
|  | Diamanti-Kandarakis et al., 2008 | Selected/referred population |
|  | Feng et al., 2018 | Selected/referred population |
|  | Flannery et al., 2013 | Selected/referred population |
|  | Ganie et al., 2010 | Selected/referred population |
|  | Goverde et al., 2009 | Selected/referred population |
|  | Gupta et al., 2019 | Selected/referred population |
|  | Hacivelioglu et al., 2013 | Selected/referred population |
|  | Hahn et al., 2005 | Selected/referred population |
|  | Hickey et al., 2011 | Selected/referred population |
|  | Islam et al., 2015 | Selected/referred population |
|  | Janse et al., 2011 | Selected/referred population |
|  | Javed et al., 2014 | Selected/referred population |
|  | Joharatnam et al., 2011 | Selected/referred population |
|  | Jonard et al., 2003 | Selected/referred population |
|  | Kar, 2013a | Selected/referred population |
|  | Kar, 2013b | Selected/referred population |
|  | Katulski et al., 2017 | Selected/referred population |
|  | Kavardzhikova and Pechlivanov, 2010 | Selected/referred population |
|  | Kelekci et al., 2010 | Selected/referred population |
|  | Khoury et al., 1996 | Selected/referred population |
|  | Kim et al., 2013 | Selected/referred population |
|  | Kim et al., 2016a | Selected/referred population |
|  | Kim et al., 2016b | Selected/referred population |
|  | Kim et al., 2019 | Selected/referred population |
|  | Kim et al., 2020 | Selected/referred population |
|  | Kocaay et al., 2018 | Selected/referred population |
|  | Koninger et al., 2014 | Selected/referred population |
|  | Kosus et al., 2011 | Selected/referred population |
|  | Kumar et al., 2016 | Selected/referred population |
|  | Kumari et al., 2018 | Selected/referred population |
|  | Kushnir et al., 2015 | Selected/referred population |
|  | Kyrkou et al., 2016 | Selected/referred population |
|  | Lam et al., 2009 | Selected/referred population |
|  | Legro et al., 2005 | Selected/referred population |
|  | Leonhardt et al., 2014 | Selected/referred population |
|  | Li and Lin, 2005 | Selected/referred population |
|  | Li et al., 2007 | Selected/referred population |
|  | Li et al., 2019 | Selected/referred population |
|  | Li et al., 2020 | Selected/referred population |
|  | Liang et al., 2011 | Selected/referred population |
|  | Lie Fong et al., 2017 | Selected/referred population |
|  | Livadas et al., 2011 | Selected/referred population |
|  | Livadas et al., 2014 | Selected/referred population |
|  | Lumezi et al., 2014 | Selected/referred population |
|  | Luque-Ramirez et al., 2015 | Selected/referred population |
|  | Ma et al., 2010 | Selected/referred population |
|  | Mahajan and Kaur, 2019 | Selected/referred population |
|  | Mahran, 2016 | Selected/referred population |
|  | Maya et al., 2020 | Selected/referred population |
|  | Mayrhofer et al., 2020 | Selected/referred population |
|  | Mehrabian et al., 2011 | Selected/referred population |
|  | Melo et al., 2011 | Selected/referred population |
|  | Melo et al., 2012 | Selected/referred population |
|  | Meun et al., 2020 | Selected/referred population |
|  | Michelmore et al., 1999 | Selected/referred population |
|  | Moghetti et al., 2013 | Selected/referred population |
|  | Morgan et al., 2008 | Selected/referred population |
|  | Morrison, 2014 | Selected/referred population |
|  | Mousa and Al Joborae, 2020 | Selected/referred population |
|  | Mukkamala et al., 2018 | Selected/referred population |
|  | Nadaraja et al., 2018 | Selected/referred population |
|  | Ni et al., 2009 | Selected/referred population |
|  | Nylander et al., 2017 | Selected/referred population |
|  | Ozdemir et al., 2010 | Selected/referred population |
|  | Ozegowska and Pawelczyk, 2015 | Selected/referred population |
|  | Panidis et al., 2012a | Selected/referred population |
|  | Panidis et al., 2012b | Selected/referred population |
|  | Panidis et al., 2013a | Selected/referred population |
|  | Panidis et al., 2013b | Selected/referred population |
|  | Panidis et al., 2013c | Selected/referred population |
|  | Panidis et al., 2014 | Selected/referred population |
|  | Pehlivanov and Orbetzova, 2007 | Selected/referred population |
|  | Peigne et al., 2018 | Selected/referred population |
|  | Pikee et al., 2016 | Selected/referred population |
|  | Polak et al., 2020 | Selected/referred population |
|  | Quinn et al., 2013 | Selected/referred population |
|  | Quinn et al., 2017 | Selected/referred population |
|  | Raskauskiene et al., 2005 | Selected/referred population |
|  | Rasool et al., 2011 | Selected/referred population |
|  | Rehme et al., 2013 | Selected/referred population |
|  | Romano et al., 2011 | Selected/referred population |
|  | Romualdi et al., 2015 | Selected/referred population |
|  | Romualdi et al., 2016 | Selected/referred population |
|  | Romualdi et al., 2019 | Selected/referred population |
|  | Sahmay et al., 2013 | Selected/referred population |
|  | Sahmay et al., 2018 | Selected/referred population |
|  | Sanad, 2014 | Selected/referred population |
|  | Sarapatkova et al., 2012 | Selected/referred population |
|  | Sathyapalan et al., 2018 | Selected/referred population |
|  | Satyaraddi et al., 2017 | Selected/referred population |
|  | Satyaraddi et al., 2019 | Selected/referred population |
|  | Schmidt et al., 2017 | Selected/referred population |
|  | Schuring et al., 2016 | Selected/referred population |
|  | Shah et al., 2010 | Selected/referred population |
|  | Shahin et al., 2020 | Selected/referred population |
|  | Shahrami et al., 2016 | Selected/referred population |
|  | Sharami et al., 2015 | Selected/referred population |
|  | Sharami et al., 2017 | Selected/referred population |
|  | Sharma et al., 2019 | Selected/referred population |
|  | Shen et al., 2014 | Selected/referred population |
|  | Shroff et al., 2007 | Selected/referred population |
|  | Silfen et al., 2003 | Selected/referred population |
|  | Souter et al., 2004 | Selected/referred population |
|  | Svetlana et al., 2019 | Selected/referred population |
|  | Tamimi et al., 2009 | Selected/referred population |
|  | Tavares and Rego Barros, 2019 | Selected/referred population |
|  | Thathapudi et al., 2014 | Selected/referred population |
|  | Tian et al., 2014 | Selected/referred population |
|  | Timpatanapong and Rojanasakul, 1997 | Selected/referred population |
|  | Tok et al., 2004 | Selected/referred population |
|  | Tosi et al., 2016 | Selected/referred population |
|  | Tosi et al., 2017 | Selected/referred population |
|  | Tripathy et al., 2018 | Selected/referred population |
|  | Tzeng et al., 2014 | Selected/referred population |
|  | Van Helden et al., 2020 | Selected/referred population |
|  | Van Hooff et al., 1999 | Selected/referred population |
|  | Venturoli et al., 1995 | Selected/referred population |
|  | Vidhya et al., 2020 | Selected/referred population |
|  | Villarroel et al., 2015 | Selected/referred population |
|  | Vrbikova et al., 2011 | Selected/referred population |
|  | Vutyavanich et al., 2007 | Selected/referred population |
|  | Walch et al., 2006 | Selected/referred population |
|  | Weerakiet et al., 2004 | Selected/referred population |
|  | Wiltgen and Spritzer, 2010 | Selected/referred population |
|  | Wong et al., 2014 | Selected/referred population |
|  | Wongwananuruk et al., 2018 | Selected/referred population |
|  | Woo et al., 2012 | Selected/referred population |
|  | Yildiz et al., 2014 | Selected/referred population |
|  | Yilmaz et al., 2011 | Selected/referred population |
|  | Younesi et al., 2019 | Selected/referred population |
|  | Yue et al., 2018 | Selected/referred population |
|  | Zachurzok-Buczynska et al., 2011 | Selected/referred population |
|  | Zadehmodarres et al., 2015 | Selected/referred population |
|  | Zaeemzadeh et al., 2020 | Selected/referred population |
|  | Zahiri et al., 2016 | Selected/referred population |
|  | Zandi et al., 2010 | Selected/referred population |
|  | Zargar et al., 2005 | Selected/referred population |
|  | Zein et al., 2017 | Selected/referred population |
|  | Zhang et al., 2013 | Selected/referred population |
|  | Escobar-Morreale et al., 2001 | Self-report |
|  | Gabrielli et al., 2015 | Self-report |
|  | Jarrett et al., 2019 | Self-report |
|  | Ji et al., 2018 | Self-report |
|  | Jiao et al., 2014 | Self-report |
|  | Legro et al., 2002 | Self-report |
|  | Okoroh et al., 2012 | Self-report |
|  | Shreeyanta et al., 2020 | Self-report |
|  | Skiba et al., 2019 | Self-report |
|  | Suresh et al., 2020 | Self-report |
|  | Tamilselvi and Nalini, 2019 | Self-report |
|  | Vrbikova et al., 2003 | Self-report |
|  | Asuncion et al., 2000 | Small sample size ( n =154) |
|  | Duijkers and Klipping, 2010 | Small sample size ( n = 171) |
|  | Farquhar et al., 1994 | Small sample size ( n = 183) |
|  | Attlee et al., 2014 | Small sample size ( n = 50) |
|  | Ganie et al., 2020 | Small sample size ( n= 171) |
|  | Diamanti-Kandarakis et al., 1999 | Small sample size ( n= 192) |
|  | Gill et al., 2012 | Small sample size ( n= 227) |
|  | Boyle et al., 2012 | Small sample size ( n= 248) |
|  | Moran et al., 2010 | Small sample size (n = 105) |
|  | Merino et al., 2017 | Small sample size (n = 106) |
|  | Sharif et al., 2017 | Small sample size (n = 126) |
|  | Musmar et al., 2013 | Small sample size (n = 137) |
|  | Van Hooff et al., 2000 | Small sample size (n = 137) |
|  | Orio et al., 2016 | Small sample size (n = 141) |
|  | Lujan et al., 2013 | Small sample size (n = 168) |
|  | Konishi et al., 2018 | Small sample size (n = 188) |
|  | Koivunen et al., 1999 | Small sample size (n = 189) |
|  | Hart et al., 2010 | Small sample size (n = 244) |
|  | Ishak et al., 2012 | Small sample size (n = 244) |
|  | Kaewnin et al., 2018 | Small sample size (n = 248) |
|  | Kristensen et al., 2010 | Small sample size (n = 276) |
|  | Takahashi et al., 1992 | Small sample size (n = 30) |
|  | Villarroel et al., 2011b | Small sample size (n = 74) |
|  | Oppermann et al., 2003 | Small sample size (n = 98) |

# Table S3: Risk of bias assessment using AXIS tool.

| **Studies** | **Introduction Methods Results Discussion Others** | | | | | | | | | | | | | | | | | | | | **Total** | **Quality** |
| --- | --- | --- | --- | --- | --- | --- | --- | --- | --- | --- | --- | --- | --- | --- | --- | --- | --- | --- | --- | --- | --- | --- |
| 1 | 2 | 3 | 4 | 5 | 6 | 7 | 8 | 9 | 10 | 11 | 12 | 13* | 14 | 15 | 16 | 17 | 18 | 19* | 20 | score |
| Zhao et al. 2011 | **Y** | **Y** | **Y** | **Y** | **Y** | **Y** | **Y** | **Y** | **Y** | **Y** | **Y** | **Y** | N/A | N/A | **Y** | **Y** | **Y** | N | N | **Y** | 18 | High |
| Zhuang et al. 2014 | **Y** | **Y** | **Y** | **Y** | **Y** | **Y** | **Y** | **Y** | **Y** | **Y** | **Y** | Y | N | **Y** | **Y** | **Y** | **Y** | N | N | **Y** | 18 | High |
| Tehrani et al. 2011a | **Y** | **Y** | **Y** | **Y** | **Y** | **Y** | **Y** | **Y** | **Y** | **Y** | **Y** | **Y** | N | N | **Y** | **Y** | **Y** | **Y** | N | **Y** | 19 | High |
| Tehrani et al. 2011b | **Y** | **Y** | **Y** | **Y** | **Y** | **Y** | **Y** | **Y** | **Y** | **Y** | **Y** | **Y** | N | N | **Y** | **Y** | **Y** | **Y** | N | **Y** | 19 | High |
| Tehrani et al. 2014 | **Y** | **Y** | **Y** | **Y** | **Y** | **Y** | **Y** | **Y** | **Y** | **Y** | **Y** | **Y** | DK | N | **Y** | **Y** | **Y** | **Y** | N | **Y** | 19 | High |
| Gambineri et al. 2013 | **Y** | **Y** | **Y** | ***Y*** | ***Y*** | ***Y*** | DK | ***Y*** | ***Y*** | ***Y*** | ***Y*** | ***Y*** | DK | ***Y*** | ***Y*** | ***Y*** | ***Y*** | *N* | N | **Y** | 18 | High |
| Makweet al. 2023 | **Y** | **Y** | **Y** | **Y** | **Y** | **Y** | **Y** | **Y** | **Y** | **Y** | **Y** | N/A | DK | N/A | N/A | N/A | N/A | N/A | N | **Y** | 20 | High |
| Suturina et al. 2022 | **Y** | **Y** | **Y** | **Y** | **Y** | DK | DK | **Y** | **Y** | **Y** | **Y** | **Y** | DK | N | **Y** | **Y** | **Y** | **Y** | N | **Y** | 17 | High |
| Kim et al. 2011 | **Y** | **Y** | **Y** | **Y** | N | N | DK | **Y** | **Y** | **Y** | **Y** | **Y** | DK | **Y** | **Y** | **Y** | **Y** | **Y** | N | **Y** | 17 | High |
| Yildiz et al. 2012 | **Y** | **Y** | **Y** | **Y** | N | N | DK | **Y** | **Y** | **Y** | **Y** | **Y** | DK | **Y** | **Y** | **Y** | **Y** | **Y** | N | **Y** | 17 | High |
| Knochenhauer et al. 1998 | **Y** | **Y** | **Y** | **Y** | N | N | DK | **Y** | **Y** | **Y** | **Y** | **Y** | DK | **Y** | **Y** | **Y** | **Y** | **Y** | N | **Y** | 17 | High |
| Azziz et al. 2004 | **Y** | **Y** | **Y** | **Y** | N | N | DK | **Y** | **Y** | **Y** | **Y** | **Y** | DK | **Y** | **Y** | **Y** | **Y** | **Y** | N | **Y** | 17 | High |
| Note: Y: Yes, N: No, DK:: Don’t know, N/A: Not applicable, *: Item is scored in reverse.  Introduction: 1, Methods: 2-11, Results: 12-16, Discussion: 17-18, Other: 19-20  Items: 1. Were the aims/objectives of the study clear? 2. Was the study design appropriate for the stated aim(s)? 3. Was the sample size justified? 4. Was the target/reference population clearly defined? (Is it clear who the research was about?) 5. Was the sample frame taken from an appropriate population base so that it closely represented the target/reference population under investigation? 6. Was the selection process likely to select subjects/participants that were representative of the target/reference population under investigation? 7. Were measures undertaken to address and categorise non-responders? 8. Were the risk factors and outcome variables measured appropriate to the aims of the study? 9. Were the risk factor and outcome variables measured correctly using instruments/ measurements that had been trialled, piloted or published previously? 10. Is it clear what was used to determine statistical significance and/or precision estimates? (eg, p values, CIs) 11. Were the methods (including statistical methods) sufficiently described to enable them to be repeated? 12. Were the basic data adequately described? 13. Does the response rate raise concerns about non-response bias? 14. If appropriate, was information about non-responders described? 15. Were the results internally consistent? 16. Were the results for the analyses described in the methods, presented? 17. Were the authors' discussions and conclusions justified by the results? 18. Were the limitations of the study discussed? 19. Were there any funding sources or conflicts of interest that may affect the authors’ interpretation of the results? 20. Was ethical approval or consent of participants attained? | | | | | | | | | | | | | | | | | | | | | | |

# Table S4: Harmonised variables with definitions in the P-PUP study dataset.

| **Variable** | **Definitions/unit** | **Upper limit of exclusion** | **Lower limit of exclusion** | **Rationale** |
| --- | --- | --- | --- | --- |
| **Sociodemographic outcomes** | | | | |
| Age | Age at the time of survey in years | n/a | n/a | All are included in the dataset |
| Ethnicity | Race/ethnic background of the participants | n/a | n/a | All are included in the dataset |
| **Cardiometabolic outcomes** | | | | |
| SBP | Systolic blood pressure in mmHg | n/a | 20 | DBP >SBP, 10 SD from mean & SBP < 20 mmHg |
| DBP | Diastolic blood pressure in mmHg | n/a | 15 | 10 SD from mean & DBP <15 mmHg |
| Height | Height of the participants in centimetres (cm) | 120 | n/a | Clinical decision as implausible ( <120 cm) |
| Weight | Weight of the participant in kilogram (kg) |  |  | 5 SD from mean |
| BMI | Body mass index in kg/m2 |  |  | 5 SD from mean for BMI & weight |
| Waist circumference | Waist circumference in centimetres |  |  | 5 SD from mean |
| Hip circumference | Hip circumference in centimetres |  |  | 5 SD from mean |
| whr | Waist-to-hip ratio |  |  | 10 SD from mean |
| FBS | Fasting blood sugar in mmol/L |  |  | 10 SD from mean |
| Insulin | Fasting insulin in pmol/L |  |  | 5 SD from mean |
| HOMA-IR | Homeostatic model assessment for insulin resistance |  |  | 5 SD from mean for insulin & 10 SD for FBS |
| Total cholesterol | Total cholesterol in mmol/L |  |  | 5 SD from mean |
| HDL-C | High-density lipoprotein cholesterol in mmol/L |  |  | 5 SD from mean |
| LDL-C | Low-density lipoprotein cholesterol in mmol/L |  |  | 5 SD from mean |
| Triglycerides | Triglycerides in mmol/L |  |  | 10 SD from mean |
| **Reproductive outcomes** | | | | |
| mFG score | Modified Ferriman-Gallwey score | n/a | n/a | All are included in the dataset |
| TT | Total testosterone in nmol/L |  |  | 5 SD from mean |
| FT | Free testosterone in nmol/L |  |  | 5 SD from mean |
| FAI | Free androgen index |  |  | 5 SD from mean for FAI, TT & SHBG. |
| A4 | Androstenedione in nmol/L |  |  | 5 SD from mean |
| DHEAS | Dehydroepiandrosterone sulfate in µmol/L |  |  | 5 SD from mean |
| SHBG | Sex hormone binding globulin in nmol/L |  |  | 5 SD from mean |
| Age of menarche | Age of menarche in years | n/a | n/a | All are included in the dataset |
| Menstrual cycle number/year | Average number of menstrual cycles per year | n/a | n/a | All are included in the dataset |
| Menstrual cycle length (days) | Average menstrual cycle length in days | n/a | 14 | Clinical decision as implausible (< 14 days) |
| OV | Ovarian volume; highest value of either LOV/ROV in cubic centimetres | 46.5 | n/a | 5 SD from mean |
| LOV | Left ovarian volume in cubic centimetres | 46.5 | n/a | 5 SD from mean |
| ROV | Right ovarian volume in cubic centimetres | 46.5 | n/a | 5 SD from mean |
| AFC | Anthral follicular count: highest value of either LOFN/ROFN | 62 | 0 | 10 SD from mean & excluding zero values |
| LOFN | Left ovary follicular number | 62 | 0 | 10 SD from mean & excluding zero values |
| ROFN | Right ovary follicular number | 62 | 0 | 10 SD from mean & excluding zero values |
| **Secondary cause screening features** | | | | |
| Prolactin | Prolactin in µg/L | 67.2 | n/a | Clinical decision |
| FSH | Follicle-stimulating hormone in IU/L | 25 | n/a | Clinical decision |
| LH | Letenising hormone in IU/L | n/a | n/a | All are included in the dataset |
| TSH | Thyroid stimulating hormone in µU/mL | 5 | n/a | Clinical decision |
| 17-OHP | 17-Hydroxyprogesterone in nmol/L | 30 | n/a | Clinical decision |
| **PCOS diagnostic features** | | | | |
| OD | Ovulatory dysfunction (defined as EITHER <8 or >17 cycles per year OR menstrual cycle length <21 or >35 days). | | | |
| Hirsutism | Clinical hyperandrogenism (defined using cluster cut-off for each ethnicity with White Iranians (cut-off of 8), White Italians and Black Africans (cut-off of 7), Black Americans, White Russians, and Asian Han Chinese (cut-off of 5), and White Americans, Asian, Russians, Mixed Russians, and Asian Koreans (cut-off of 4). | | | |
| PCOM* | Polycystic ovary morphology (AFN ≥ 12 and/or ovarian volume ≥ 10 cm3) | | | |
| **Note:** Outliers were identified using scatter plots and box plots, applying a criterion where values exceeding >5 or >10 standard deviations were flagged in each study. Cut-offs and clinical decisions were used to exclude participants having disorders with elevated levels of hormones tested in exclusion of other conditions in the diagnosis of PCOS. *: In one study (Makwe et al. 2023) PCOM was defined as having AFN ≥ 20 and/or OV ≥ 10 cm3 due to the use of new ultrasound technology. n/a: not applicable. Blank spaces represent cases where the upper limit was above 5 or 10 SD and the lower limit was below 5 or 10 SD.  The reported laboratory values were standardised into the International System (SI) unit using the following conversion factors: for A4 3.49 from ng/mL to nmol/L and 0.00349 from pg/mL to nmol/L; for TT 3.47 from ng/mL to nmol/L and 0.0347 from ng/dL to nmol/L; for FT 0.003467 from pg/mL to nmol/L and 0.03467 from ng/dL to nmol/L; for DHEAS 0.00271 ng/mL to µmol/L and 0.0271 µg/dL to µmol/L; for cholesterol, HDL, and LDL 0.0259 from mg/dL to mmol/L; for triglycerides 0.0113 from mg/dL to mmol/L; for FBS 0.0555 from mg/dL to mmol/L; for prolactin 0.047 from mIU/L to µg/L; for 17-OHP 3.0261 from ng/mL to nmol/L. | | | | |

# Table S5. Data collection methods for ovulatory dysfunction across studies.

| **Studies** | **Variable name** | **Definitions** |
| --- | --- | --- |
| Zhao et al. 2011 | Menstrual cycle when participating in the survey | 1: <21 days  2: 21-35 days  3: >35 days  4: Irregular/inordinate |
| Zhuang et al. 2014 | Menstrual cycle status | 0: Regular (21-35 days)  1: Irregular (<21 or >35 days) |
| Maximum | Maximum cycle length in days |
| Minimum | Minimum cycle length in days |
| Maximum | Maximum number of cycles per year |
| Minimum | Minimum number of cycles per year |
| Tehrani et al. 2011a | Mean_number | Number of menstrual cycles per year without treatment |
| Mean_mens | Mean of a menstrual interval in days. |
| Tehrani et al. 2011b | Mens_mean_year | Average menstrual number per year |
| MoQ12 | Menstrual interval in days |
| Tehrani et al. 2014 | Mean_number | Average number of menses per year |
| q12 | Menstrual interval in days |
| Gambineri et al. 2013 | Mes12 | Number of menstrual cycles per year (in the past 12 months) |
| Makwe et al. 2023 | Approximately_how_many_periods | Approximately how many periods do you get a year? (When not on hormones or contraceptives). |
| Menstrual_days | If your menstrual periods are regular/irregular; how many days between periods |
| Suturina et al. 2022 | Number menstrual cycle | Average number of menstrual cycles per year |
| Menstrual_cycle | Menstrual cycle length in days |
| min_menstrual | Minimum cycle length in days |
| max_menstrual | Maximum cycle length in days |
| Kim et al. 2011 | Menstrual_cycle_lengthdaysor | Menstrual cycle length (days) or number of menstrual periods per year |
| Yildiz et al. 2012 | Menses per year | Average number of menstrual cycles per year |
| Knochenhauer et al. 1998 | Menses >35days | 0: No  1: Yes |
| Azziz et al. 2004 | Menses >35days | 0: No  1: Yes |
| Menses <26days | 0: No  1: Yes |

**Note:** In our harmonization, ovulatory dysfunction was defined per International PCOS Guidelines as EITHER <8 or >17 cycles per year OR menstrual cycle length <21 or >35 days.
